# Supplementary material for: Cranberry Arabino-Xyloglucan and Pectic Oligosaccharides Induce Lactobacillus Growth and Short-Chain Fatty Acid Production
Source: MDPI journal article supplement (doi:10.3390/microorganisms10071346), 2022-07-03
Supplement: s1 [file s1]

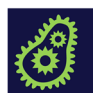

## Article

# Cranberry Arabino-Xyloglucan and Pectic Oligosaccharides Induce *Lactobacillus* Growth and Short-Chain Fatty Acid Production

Arland T. Hotchkiss, Jr. <sup>1,\*†</sup>, John A. Renye, Jr. <sup>1,†</sup>, Andre K. White <sup>1</sup>, Alberto Nunez <sup>1</sup>, Giselle K. P. Guron <sup>1</sup>, Hoa Chau <sup>1</sup>, Stefanie Simon <sup>2</sup>, Carlos Poveda <sup>3</sup>, Gemma Walton <sup>3</sup>, Robert Rastall <sup>3</sup> and Christina Khoo <sup>4</sup>

<sup>1</sup> Dairy & Functional Foods Research Unit, Agricultural Research Service, United States Department of Agriculture, Wyndmoor, PA 19038, USA; john.renye@usda.gov (J.A.R.J.); andre.white@usda.gov (A.K.W.); alberto.nunez@usda.gov (A.N.); giselle.guron@usda.gov (G.K.P.G.); rose.chau@usda.gov (H.C.)

<sup>2</sup> Sustainable Biofuels and Co-Products Research Unit, Agricultural Research Service, U.S. Department of Agriculture, Wyndmoor, PA 19038, USA; stefanie.simon@usda.gov

<sup>3</sup> Department of Food and Nutritional Sciences, The University of Reading, Harry Nursten Building, Pepper Lane, Whiteknights, Reading RG6 6DZ, UK; c.g.povedaturrado@reading.ac.uk (C.P.); g.e.walton@reading.ac.uk (G.W.); r.a.rastall@reading.ac.uk (R.R.)

<sup>4</sup> Ocean Spray Cranberries, Inc., One Ocean Spray Drive, Lakeville-Middleboro, MA 02349, USA; ckhoo@oceanspray.com

\* Correspondence: arland.hotchkiss@usda.gov; Tel.: +1-215-233-6448

† These authors contributed equally to this work.

## Supplementary Materials:

**Table S1.** MALDI-TOF MS Analysis of Cranberry Oligosaccharides in Preparative HPLC Fractions.

| <u>m/z (Na<sup>+</sup>)</u> | <u>Structure</u>        | <u>m/z(Na<sup>+</sup>)</u> | <u>Structure</u>             |
|-----------------------------|-------------------------|----------------------------|------------------------------|
| 761                         | Pent3Hex2               | 1315                       | PentdHexHex3HexA2uHexA       |
| 769                         | Pent3dHexuHexAMe2       | 1333                       | Pent6Hex2HexA                |
| 785                         | Pent2dHexuHexAMe        | 1341                       | Pent2dHexHexHexA3uHexAAc     |
| 789                         | Pent2dHexHexHexA        | 1345                       | dHexHex4HexA2uHexA           |
| 791                         | Pent2Hex3               | 1357                       | Pent5dHexHexHexAuHexAMe      |
| 815                         | PentdHexHexHexAuHexA    | 1363                       | Pent5Hex3HexA                |
| 829                         | PentdHexHexHexAuHexAMe  | 1375                       | PentdHexHex3HexA3Ac          |
| 831                         | Pent2dHexHexHexAAc      | 1379                       | Pent4Hex5                    |
| 833                         | Pent6 or Pent2Hex3Ac    | 1393                       | Pent4Hex5Me                  |
| 843                         | PentdHexHexHexAuHexAMe2 | 1423                       | Pent3Hex6Me                  |
| 855                         | Pent2dHexHexAuHexAAcMe2 | 1477                       | PentdHexHex4HexA2uHexA       |
| 857                         | PentdHexHexHexAuHexAAc  | 1495                       | Pent6Hex3HexA                |
| 923                         | Pent3Hex3               | 1507                       | dHexHex5HexA2uHexA           |
| 945                         | Pent3dHexHexAuHexAMe2   | 1511                       | Pent5Hex5                    |
| 953                         | Pent2Hex4               | 1525                       | Pent5Hex4HexA                |
| 959                         | Pent3dHexHexAuHexAAc    | 1533                       | Pent5dHexHex2HexAuHexAMe2    |
| 965                         | Pent7 or Pent3Hex3Ac    | 1541                       | Pent2dHex3HexA3uHexAAc2Me2   |
| 973                         | Pent3dHexHexAuHexAAcMe  | 1555                       | Pent4Hex6Me                  |
| 987                         | Pent3dHexHexAuHexAAcMe2 | 1571                       | PentdHex3HexHexA3uHexAAc2Me2 |
| 989                         | Pent2dHexHexHexAuHexAAc | 1579                       | Pent3dHexHex3HexA2uHex       |
| 995                         | Pent6Hex                | 1669                       | dHexHex6HexA2uHexA           |
|                             |                         | 1673                       | Pent3dHex3HexA3uHexAAc2Me2   |

|                          |                             |      |                                |
|--------------------------|-----------------------------|------|--------------------------------|
| 1003                     | Pent2dHexHexHexAuHex-AAcMe  | 1703 | Pent2dHex3HexHexA3uHexAAc2Me2  |
| 1009                     | Pent6HexA                   | 1805 | Pent2dHex3Hex2HexA3uHexAAc2Me2 |
| 1017                     | Pent2dHexHexHexAuHex-AAcMe2 | 1835 | Pent4dHex3HexA3uHexAAc2Me2     |
| 1055                     | Pent4Hex3                   | 1865 | Pent3dHex3HexHexA3uHexAAc2 Me2 |
| 1069                     | Pent4Hex2HexA               | 1937 | Pent5dHex3HexA3uHexAAc2Me2     |
| 1085                     | Pent3Hex4                   | 1967 | Pent4dHex3HexHexA3uHexAAc2Me2  |
| 1097                     | Pent8 or Pent4Hex3Ac        | 1997 | Pent3dHex3Hex2HexA3uHexAAc2Me2 |
| 1099                     | Pent3Hex4Me                 | 2069 | Pent6dHex3HexA3uHexAAc2Me2     |
| 1123                     | Pent2dHexHexHexA2uHexA      | 2099 | Pent5dHex3HexHexA3uHexAAc2 Me2 |
| 1135                     | Pent3dHexHexHexAuHex-AAcMe  | 2129 | Pent4dHex3Hex2HexA3uHexAAc2Me2 |
| 1153                     | PentdHexHex2HexA2uHexA      | 2159 | Pent3dHex3Hex3HexA3uHexAAc2Me2 |
| 1149                     | Pent3dHexHexHexAuHex-AAcMe2 | 2231 | Pent6dHex3HexHexA3uHexAAc2Me2  |
| 1171                     | Pent6HexHexA                | 2261 | Pent5dHex3Hex2HexA3uHexAAc2Me2 |
| 1183                     | dHexHex3HexA2uHexA          | 2291 | Pent4dHex3Hex3HexA3uHexAAc2Me2 |
| 1201                     | Pent5Hex2HexA               | 2321 | Pent3dHex3Hex4HexA3uHexAAc2Me2 |
| 1211                     | Pent4dHexHexHexAuHexA       | 2393 | Pent6dHex3Hex2HexA3uHexAAc2Me2 |
| 1217                     | Pent4Hex4                   | 2423 | Pent5dHex3Hex3HexA3uHexAAc2Me2 |
| 1229                     | Pent9                       | 2453 | Pent4dHex3Hex4HexA3uHexAAc2Me2 |
| 1247                     | Pent3Hex5                   | 2525 | Pent7dHex3Hex2HexA3uHexAAc2Me2 |
| 1253                     | Pent4dHexHexHexAuHexAAc     | 2555 | Pent6dHex3Hex3HexA3uHexAAc2Me2 |
| 1261                     | Pent3Hex5Me                 | 2585 | Pent5dHex3Hex4HexA3uHexAAc2Me2 |
| 1281                     | Pent4dHexHexHexAuHex-AAcMe2 | 2717 | Pent6dHex3Hex4HexA3uHexAAc2Me2 |
| 1313                     |                             |      |                                |
| Pent2dHexHex3HexAuHexAAc |                             |      |                                |

Table S2. *Lactobacillus* and *Bifidobacterium* species in used in this study.

| <b>Bacteria</b>             | <b>Source<sup>1</sup></b> |
|-----------------------------|---------------------------|
| <i>L. acidophilus</i> LA1   | DFF                       |
| <i>L. acidophilus</i> LA 6  | DFF                       |
| <i>L. acidophilus</i> LA 8  | DFF                       |
| <i>L. acidophilus</i> LA 10 | DFF                       |
| <i>L. acidophilus</i> LA 15 | DFF                       |
| <i>L. acidophilus</i> LA 30 | DFF                       |
| <i>L. acidophilus</i> B1912 | NRRL                      |
| <i>L. acidophilus</i> RP32  | DFF                       |
| <i>L. amylophilus</i> B4437 | NRRL                      |
| <i>L. amylophilus</i> B4481 | NRRL                      |
| <i>L. amylovorus</i> B4540  | NRRL                      |
| <i>L. amylovorus</i> B4548  | NRRL                      |
| <i>L. animalis</i> B14176   | NRRL                      |
| <i>L. animalis</i> B14177   | NRRL                      |
| <i>L. arabinosis</i> B787   | NRRL                      |
| <i>L. brevis</i> B4527      | NRRL                      |
| <i>L. brevis</i> B1127      | NRRL                      |
| <i>L. brevis</i> 3057       | DFF                       |
| <i>L. brevis</i> 1836       | DFF                       |
| <i>L. buchneri</i> LB5      | DFF                       |
| <i>L. buchneri</i> B1838    | NRRL                      |
| <i>L. buchneri</i> B1860    | NRRL                      |

---

|                                                   |      |
|---------------------------------------------------|------|
| <i>L. bulgaricus</i> LB1                          | DFF  |
| <i>L. bulgaricus</i> LB6                          | DFF  |
| <i>L. bulgaricus</i> LB11                         | DFF  |
| <i>L. bulgaricus</i> LB12                         | DFF  |
| <i>L. bulgaricus</i> LB15                         | DFF  |
| <i>L. bulgaricus</i> LB21                         | DFF  |
| <i>L. bulgaricus</i> YB1                          | DFF  |
| <i>L. bulgaricus</i> B440                         | NRRL |
| <i>L. casei</i> 4646                              | ATCC |
| <i>L. casei</i> LC2                               | DFF  |
| <i>L. casei</i> 393                               | ATCC |
| <i>L. casei</i> B1922                             | NRRL |
| <i>L. casei</i> B441                              | NRRL |
| <i>L. casei</i> LC3                               | DFF  |
| <i>L. casei</i> B1255                             | NRRL |
| <i>L. rhamnosus</i> EV2                           | DFF  |
| <i>L. rhamnosus</i> B442                          | NRRL |
| <i>L. coryniformis</i> ssp. <i>torquens</i> B4390 | NRRL |
| <i>L. curvatus</i> B4562                          | NRRL |
| <i>L. delbrueckii</i> ssp. <i>lactis</i> B735     | NRRL |
| <i>L. delbrueckii</i> B443                        | NRRL |
| <i>L. delbrueckii</i> B1658                       | NRRL |
| <i>L. delbrueckii</i> ssp. <i>lactis</i> B736     | NRRL |
| <i>L. delbrueckii</i> ssp. <i>lactis</i> B1844    | NRRL |
| <i>L. delbrueckii</i> ssp. <i>lactis</i> B1930    | NRRL |
| <i>L. delbrueckii</i> ssp. <i>lactis</i> B4523    | NRRL |
| <i>L. fermentum</i> B4525                         | NRRL |
| <i>L. farciminis</i> LF 25 (B4566)                | NRRL |
| <i>L. fermentum</i> B585                          | NRRL |
| <i>L. fermentum</i> B1925                         | NRRL |
| <i>L. fermentum</i> B14171                        | NRRL |
| <i>L. fructosus</i> 2041                          | DFF  |
| <i>L. gasserii</i> 1912                           | DFF  |
| <i>L. gasserii</i> 4240                           | DFF  |
| <i>L. gasserii</i> 14175                          | DFF  |
| <i>L. helveticus</i> B4526                        | NRRL |
| <i>L. helveticus</i> EV1                          | DFF  |
| <i>L. helveticus</i> B1842                        | NRRL |
| <i>L. helveticus</i> B1935                        | NRRL |
| <i>L. helveticus</i> B1942                        | NRRL |
| <i>L. helveticus</i> B1929                        | NRRL |
| <i>L. lactis</i> FARR                             | OSU  |
| <i>L. mali</i> B4563                              | NRRL |
| <i>L. paracasei</i> B4564                         | NRRL |
| <i>L. paraplantarum</i> B23115                    | NRRL |
| <i>L. plantarum</i> 14917                         | ATCC |
| <i>L. plantarum</i> NCDO955                       | DFF  |
| <i>L. plantarum</i> B4496                         | NRRL |
| <i>L. plantarum</i> B1846                         | NRRL |
| <i>L. plantarum</i> B1926                         | NRRL |
| <i>L. plantarum</i> TSH076                        | NRRL |
| <i>L. plantarum</i> BAA793                        | ATCC |
| <i>L. reuteri</i> 23272                           | ATCC |
| <i>L. rhamnosus</i> GG                            | ATCC |
| <i>L. rhamnosus</i> B176                          | NRRL |
| <i>L. rhamnosus</i> B1914                         | NRRL |
| <i>L. rhamnosus</i> B1937                         | NRRL |
| <i>L. rhamnosus</i> BLCR1                         | DFF  |
| <i>L. ruminus</i> 14583                           | DFF  |
| <i>L. salivarius</i> ssp. <i>salivarius</i> B1949 | NRRL |

---

|                                                                        |           |
|------------------------------------------------------------------------|-----------|
| <i>L. salivarius</i> ssp. <i>salicinus</i> B1950                       | NRRL      |
| <i>L. sharpeae</i> B14855                                              | NRRL      |
| <i>L. (Weissella) viridescens</i> B1951                                | NRRL      |
| <i>L. (Weissella) confusa</i> B1064                                    | NRRL      |
| <i>L. acidophilus</i> 1426                                             | Luchansky |
| <i>L. reuteri</i> 1428                                                 | Luchansky |
| <i>Bifidobacterium breve</i> 2141 (ATCC 15698)                         | Luchansky |
| <i>Bifidobacterium longum</i> subsp. <i>infantis</i> 3300 (ATCC 15697) | Luchansky |
